# Supplementary material for: Metformin Treatment Reduces CRC Aggressiveness in a Glucose-Independent Manner: An In Vitro and Ex Vivo Study
Source: MDPI journal article supplement (doi:10.3390/cancers15143724), 2023-07-22
Supplement: s1 [file s1]

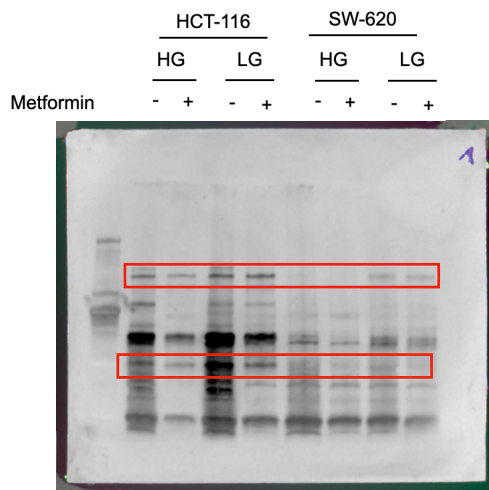

Western Blot : E-cadherin *in vitro*  
Figure 3(b)

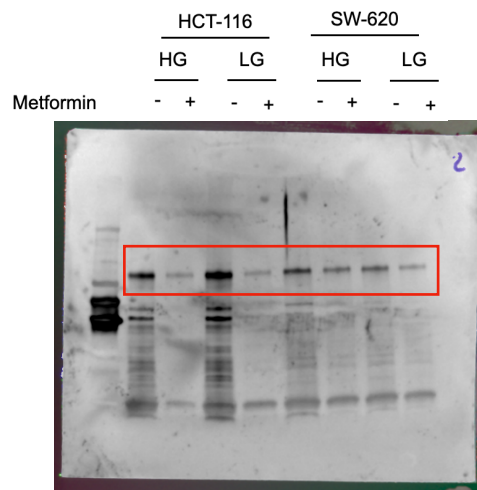

Western Blot : Sortilin *in vitro*  
Figure 3(b)

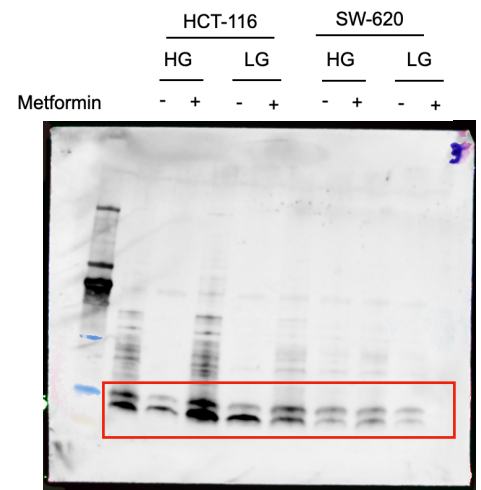

Western Blot : LC3-B *in vitro*  
Figure 3(b)

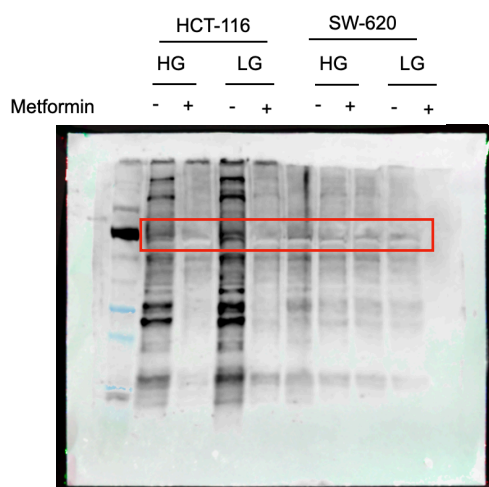

Western Blot : MMP2 *in vitro*  
Figure 3(b)

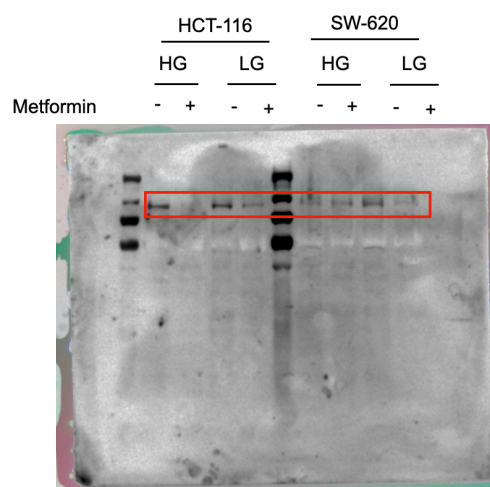

Western Blot : MMP9 *in vitro*  
Figure 3(b)

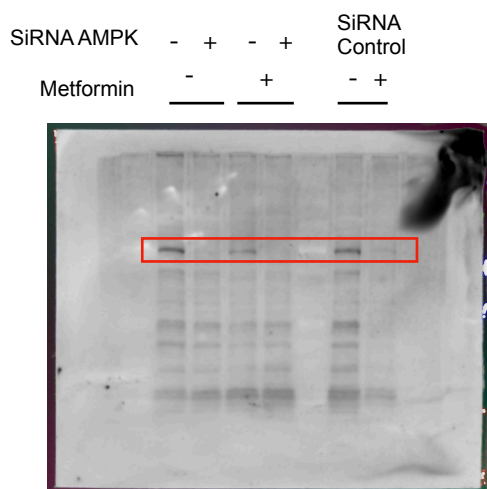

Western Blot : AMPK HCT-116 High  
Glucose *in vitro*  
Figure 4(b)

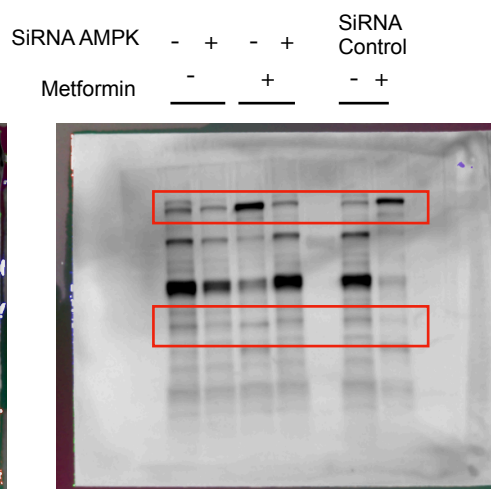

Western Blot : E-cadherin HCT-116  
High Glucose *in vitro*  
Figure 4(b)

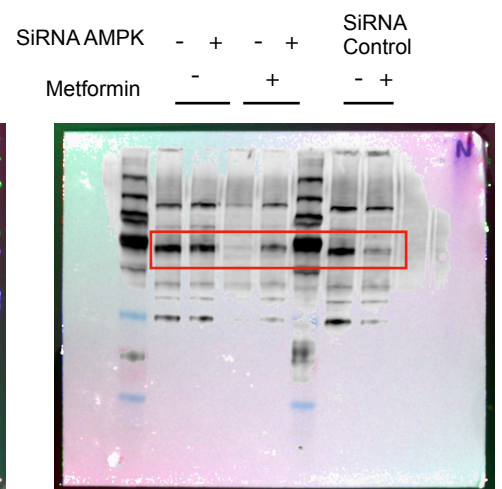

Western Blot : MMP2 HCT-116 High  
Glucose *in vitro*  
Figure 4(b)

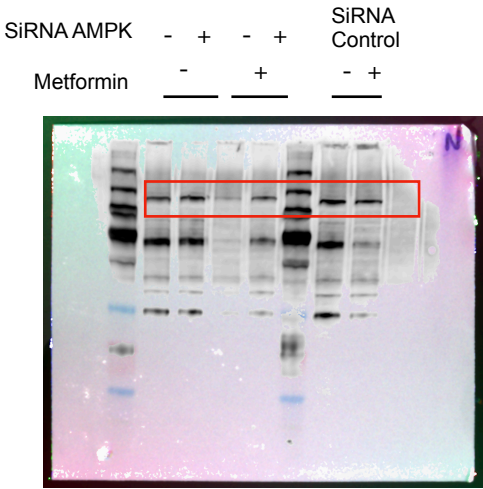

Western Blot : MMP9 HCT-116 High  
Glucose *in vitro*  
Figure 4(b)

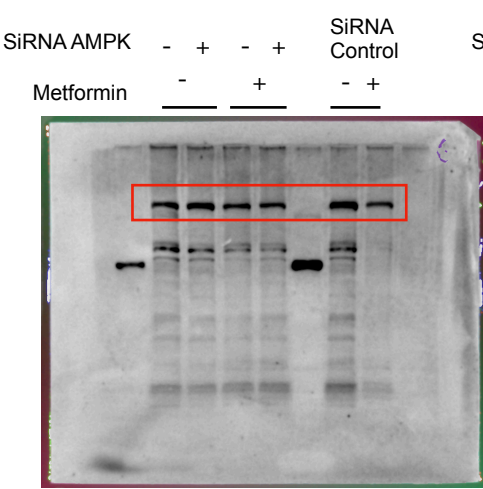

Western Blot : Sortilin HCT-116 High  
Glucose *in vitro*  
Figure 4(b)

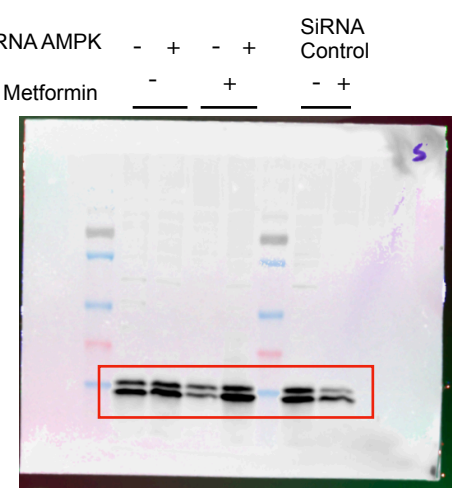

Western Blot : LC3-B HCT-116 High  
Glucose *in vitro*  
Figure 4(b)

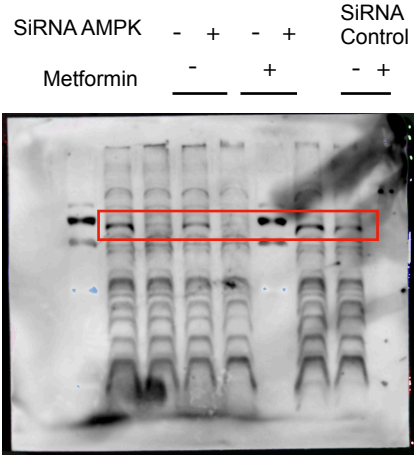

Western Blot : AMPK HCT-116 Low  
Glucose *in vitro*  
Figure 4(a)

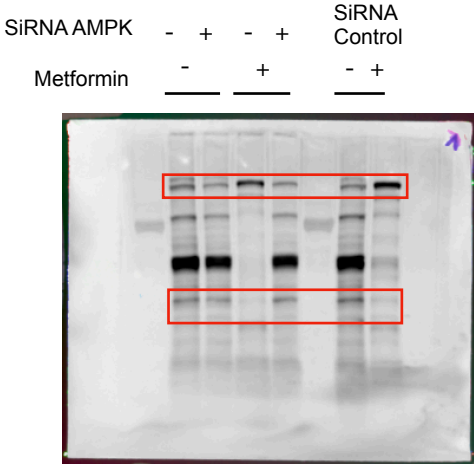

Western Blot : E-cadherin HCT-116  
Low Glucose *in vitro*  
Figure 4(a)

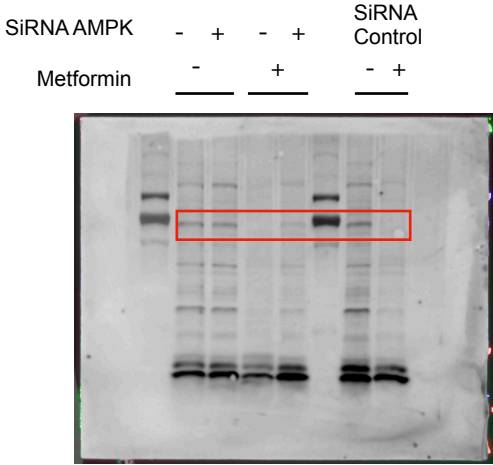

Western Blot : MMP2 HCT-116 Low  
Glucose *in vitro*  
Figure 4(a)

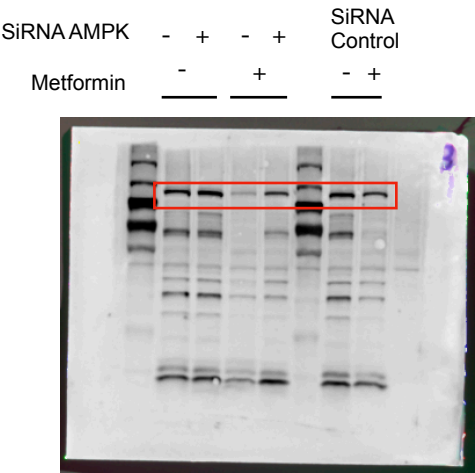

Western Blot : MMP9 HCT-116 Low  
Glucose *in vitro*  
Figure 4(a)

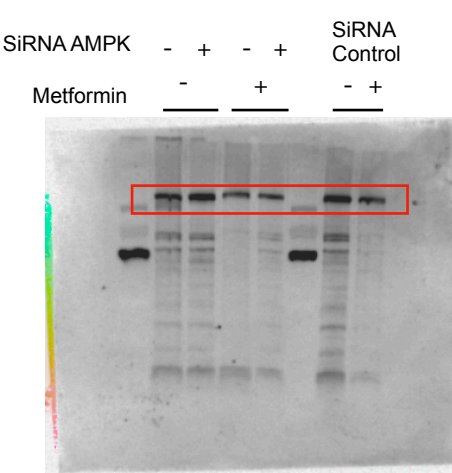

Western Blot : Sortilin HCT-116 Low  
Glucose *in vitro*  
Figure 4(a)

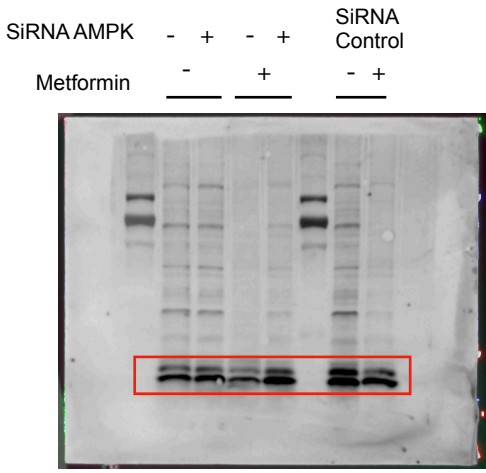

Western Blot : LC3-B HCT-116 Low  
Glucose *in vitro*  
Figure 4(a)



|            |   |   |   |   |               |
|------------|---|---|---|---|---------------|
| SiRNA AMPK | - | + | - | + | SiRNA Control |
| Metformin  | - | + | - | + | -             |

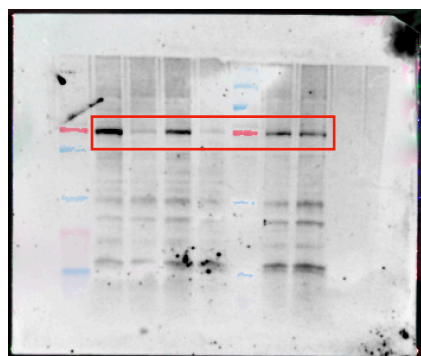

Western Blot : AMPK SW-620 High  
Glucose *in vitro*  
Figure 4(f)

|            |   |   |   |   |               |
|------------|---|---|---|---|---------------|
| SiRNA AMPK | - | + | - | + | SiRNA Control |
| Metformin  | - | + | - | + | -             |

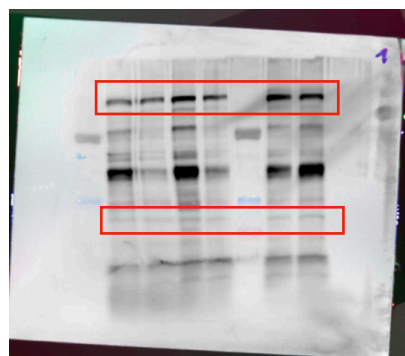

Western Blot : E-cadherin SW-620  
High Glucose *in vitro*  
Figure 4(f)

|            |   |   |   |   |               |
|------------|---|---|---|---|---------------|
| SiRNA AMPK | - | + | - | + | SiRNA Control |
| Metformin  | - | + | - | + | -             |

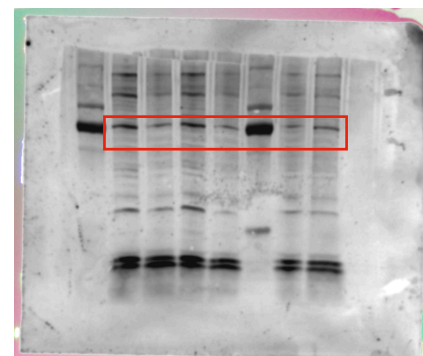

Western Blot : MMP2 SW-620 High  
Glucose *in vitro*  
Figure 4(f)

|            |   |   |   |   |               |
|------------|---|---|---|---|---------------|
| SiRNA AMPK | - | + | - | + | SiRNA Control |
| Metformin  | - | + | - | + | -             |

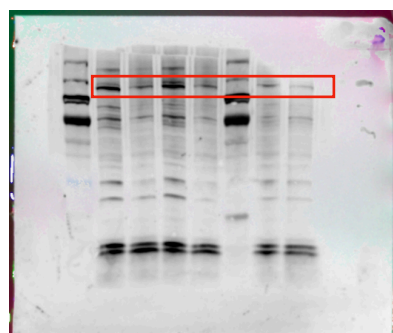

Western Blot : MMP9 SW-620 High  
Glucose *in vitro*  
Figure 4(f)

|            |   |   |   |   |               |
|------------|---|---|---|---|---------------|
| SiRNA AMPK | - | + | - | + | SiRNA Control |
| Metformin  | - | + | - | + | -             |

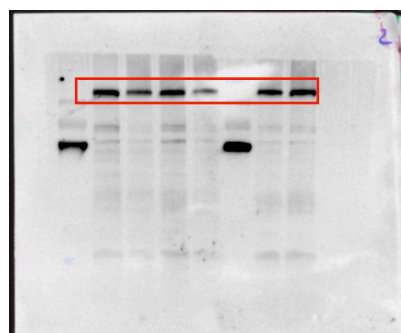

Western Blot : Sortilin SW-620 High  
Glucose *in vitro*  
Figure 4(f)

|            |   |   |   |   |               |
|------------|---|---|---|---|---------------|
| SiRNA AMPK | - | + | - | + | SiRNA Control |
| Metformin  | - | + | - | + | -             |

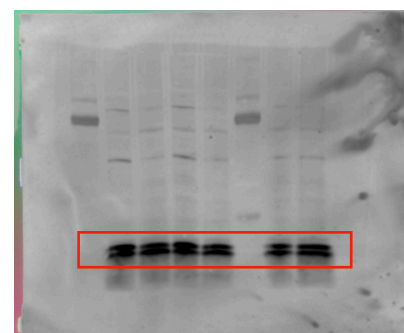

Western Blot : LC3-B SW-620 High  
Glucose *in vitro*  
Figure 4(f)

|            |   |   |   |   |               |
|------------|---|---|---|---|---------------|
| SiRNA AMPK | - | + | - | + | SiRNA Control |
| Metformin  | - | + | - | + | -             |

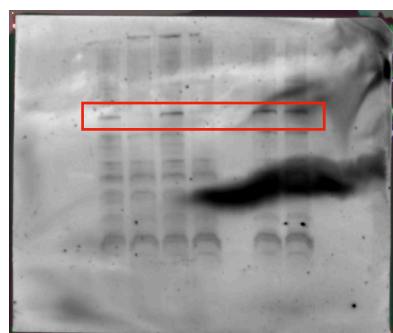

Western Blot : AMPK SW-620 Low  
Glucose *in vitro*  
Figure 4(e)

|            |   |   |   |   |               |
|------------|---|---|---|---|---------------|
| SiRNA AMPK | - | + | - | + | SiRNA Control |
| Metformin  | - | + | - | + | -             |

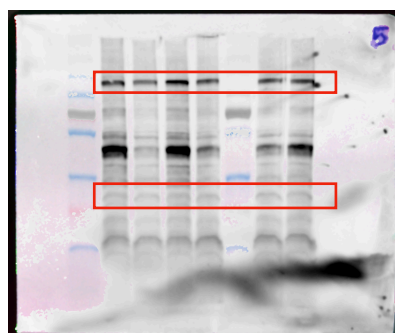

Western Blot : E-cadherin SW-620 Low  
Glucose *in vitro*  
Figure 4(e)

|            |   |   |   |   |               |
|------------|---|---|---|---|---------------|
| SiRNA AMPK | - | + | - | + | SiRNA Control |
| Metformin  | - | + | - | + | -             |

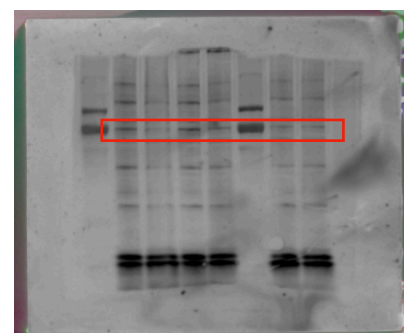

Western Blot : MMP2 SW-620 Low  
Glucose *in vitro*  
Figure 4(e)

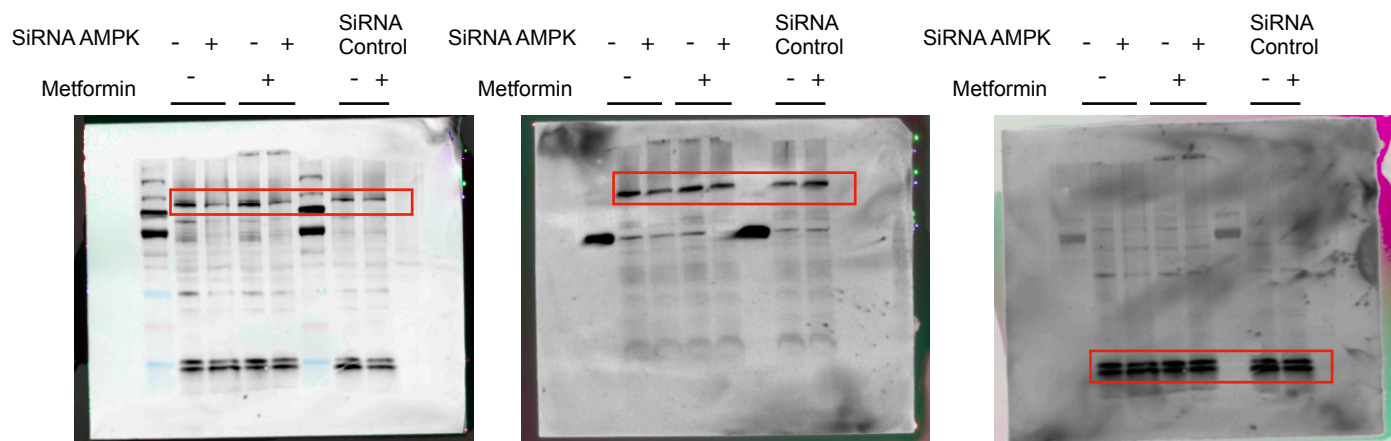

Western Blot : MMP9 SW-620 Low  
Glucose *in vitro*  
Figure 4(e)

Western Blot : Sortilin SW-620 Low  
Glucose *in vitro*  
Figure 4(e)

Western Blot : LC3-B SW-620 Low  
Glucose *in vitro*  
Figure 4(e)

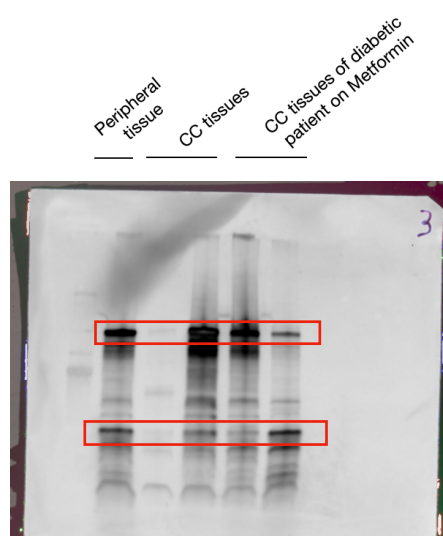

Western Blot : E-cadherin *ex vivo*,  
stade I patients' (Figure 8(a) )

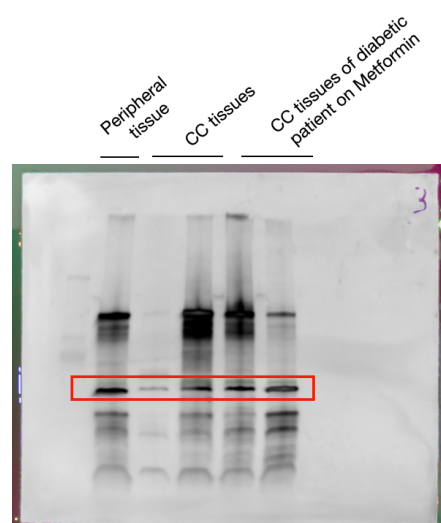

Western Blot : Actin of E-cadherin Western  
Blot *ex vivo*, stade I patients' (Figure 8(a) )

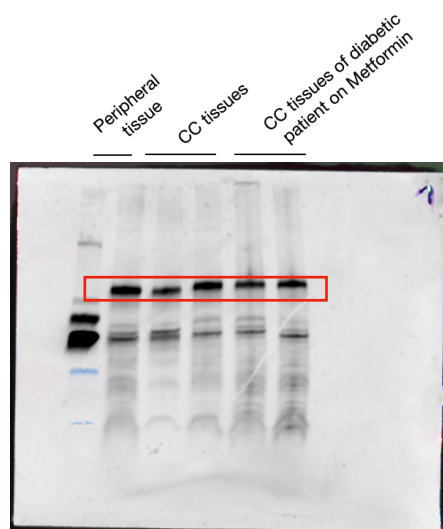

Western Blot : Sortilin *ex vivo*, stade I  
patients' (Figure 8(a) )

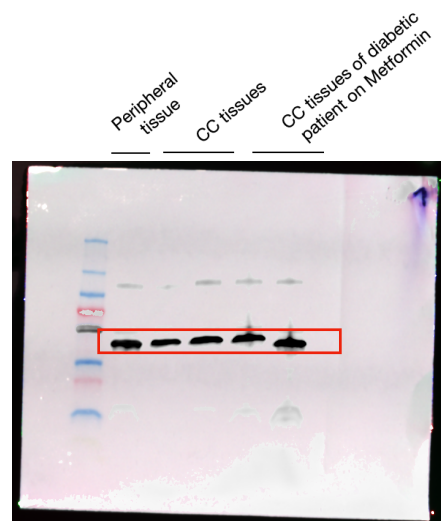

Western Blot : Actin of Sortilin Western Blot  
*ex vivo*, stade I patients' (Figure 8(a) )

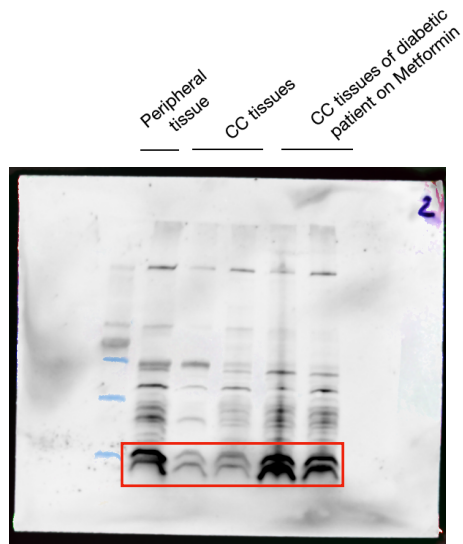

Western Blot : LC3-B *ex vivo*, **stage I patients'** (Figure 8(a) )

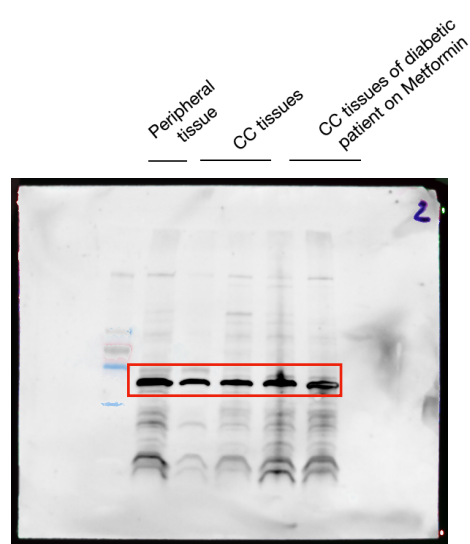

Western Blot : Actin of LC3-B Western Blot *ex vivo*, **stage I patients'** (Figure 8(a) )

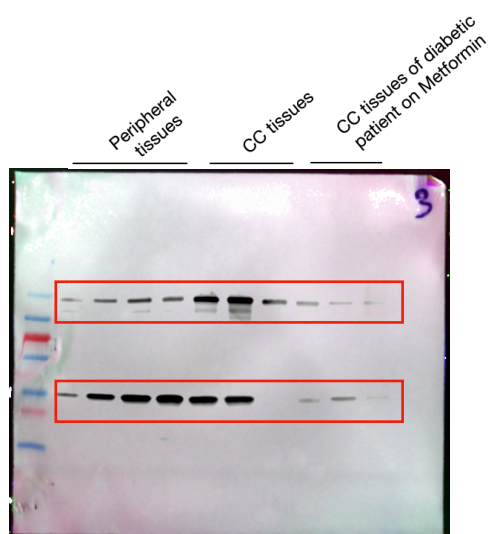

Western Blot : E-cadherin *ex vivo*, **stage II patients'** (Figure 8(b) )

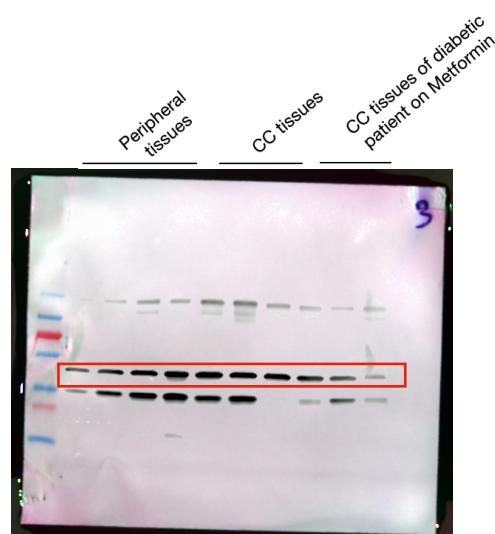

Western Blot : Actin of E-cadherin Western Blot *ex vivo*, **stage II patients'** (Figure 8(b) )

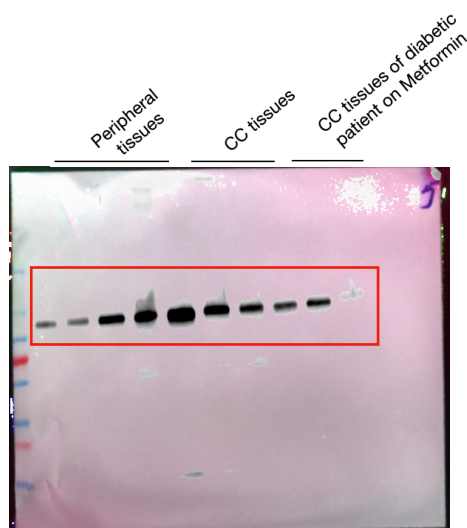

Western Blot : Sortilin *ex vivo*, **stage II patients'** (Figure 8(b) )

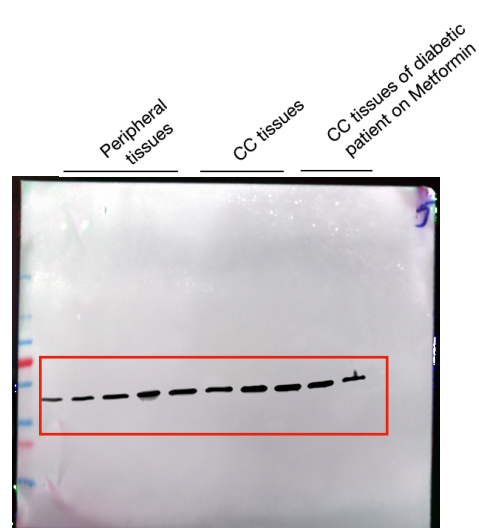

Western Blot : Actin of Sortilin Western Blot *ex vivo*, **stage II patients'** (Figure 8(b) )



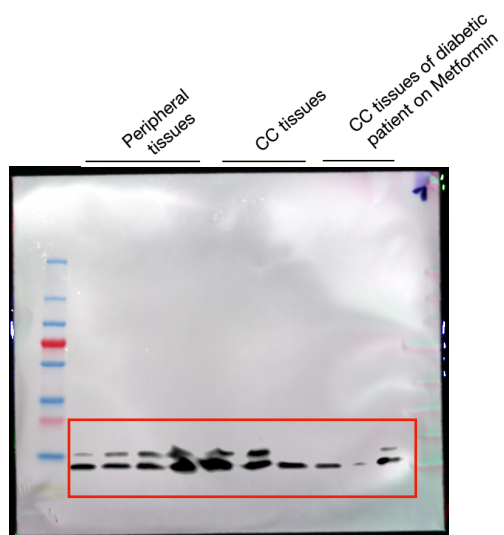

Western Blot : LC3-B *ex vivo*, **stage II patients'** (Figure 8(b) )

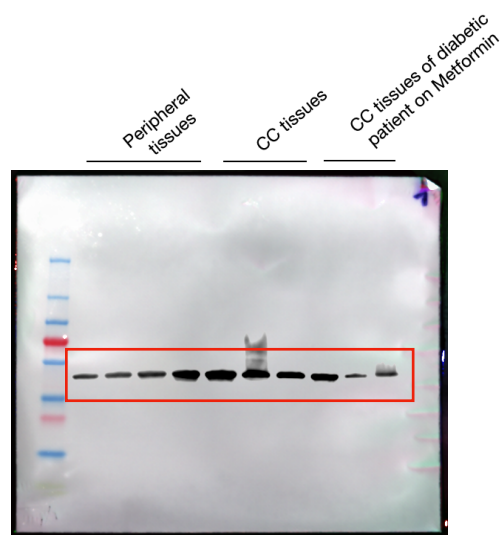

Western Blot : Actin of LC3-B Western Blot *ex vivo*, **stage II patients'** (Figure 8(b) )

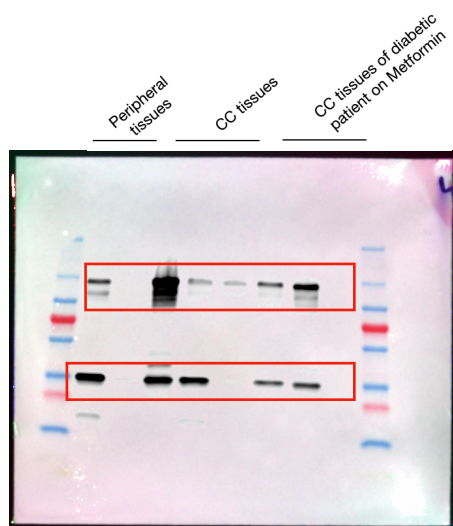

Western Blot : E-cadherin *ex vivo*, **stage III patients'** (Figure 8(c) )

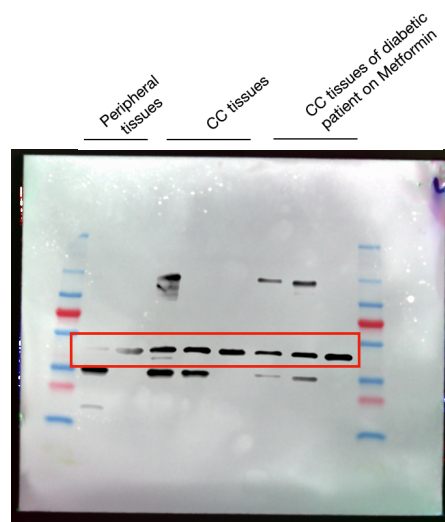

Western Blot : Actin of E-cadherin Western Blot *ex vivo*, **stage III patients'** (Figure 8(c) )

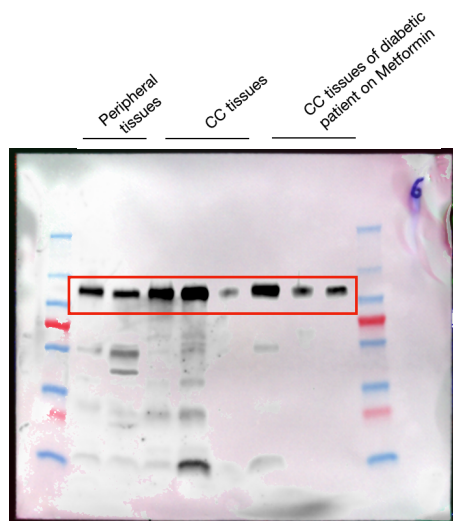

Western Blot : Sortilin *ex vivo*, **stage III patients'** (Figure 8(c) )

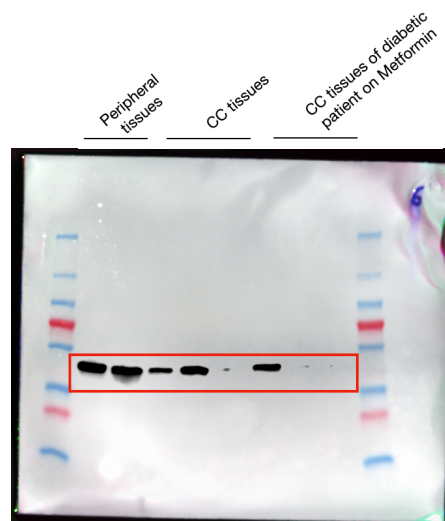

Western Blot : Actin of Sortilin Western Blot *ex vivo*, **stage III patients'** (Figure 8(c) )

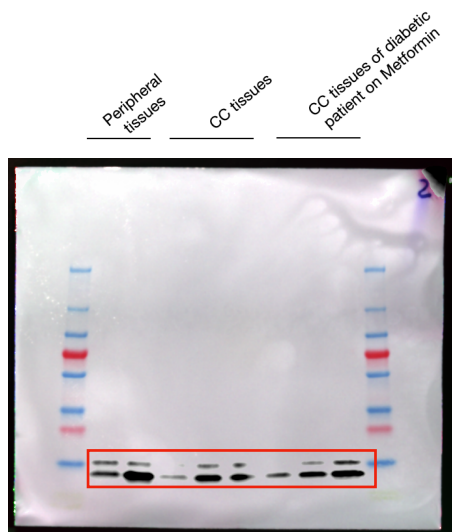

Western Blot : LC3-B *ex vivo*, **stade III patients'** (Figure 8(c) )

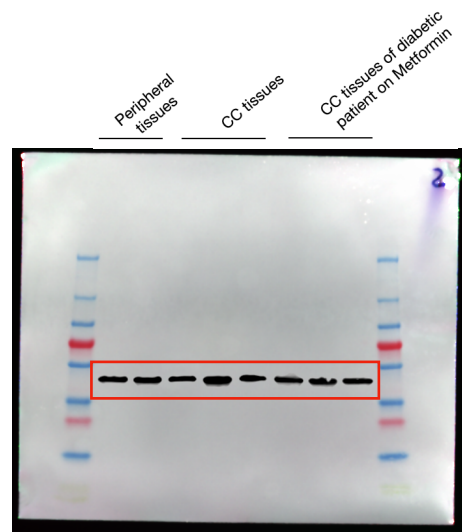

Western Blot : Actin of LC3-B Western Blot *ex vivo*, **stade III patients'** (Figure 8(c) )
